# Supplementary material for: Variable glacier response to atmospheric warming, northern Antarctic Peninsula, 1988–2009
Source: Copernicus journal article supplement (doi:10.5194/tc-6-1031-2012), 2012-09-21
Supplement: Supplementary file 1 [file inventory_cryosphere_supplementary_methods.pdf › Supplement/inventory_cryosphere_supplementary_methods.pdf]

# Supplement

**B. J. Davies<sup>1</sup>, J. L. Carrivick<sup>2</sup>, N. F. Glasser<sup>1</sup>, M. J. Hambrey<sup>1</sup>, and J. L. Smellie<sup>3</sup>**

<sup>1</sup>Centre for Glaciology, Institute for Geography and Earth Sciences, Aberystwyth University, Llandinam Building, Penglais Campus, Aberystwyth SY23 3DB

<sup>2</sup>School of Geography, University of Leeds, Leeds LS2 9JT

<sup>3</sup>Department of Geology, University of Leicester, Leicester LE1 7RH

Correspondence to: B. J. Davies  
(bdd@aber.ac.uk)

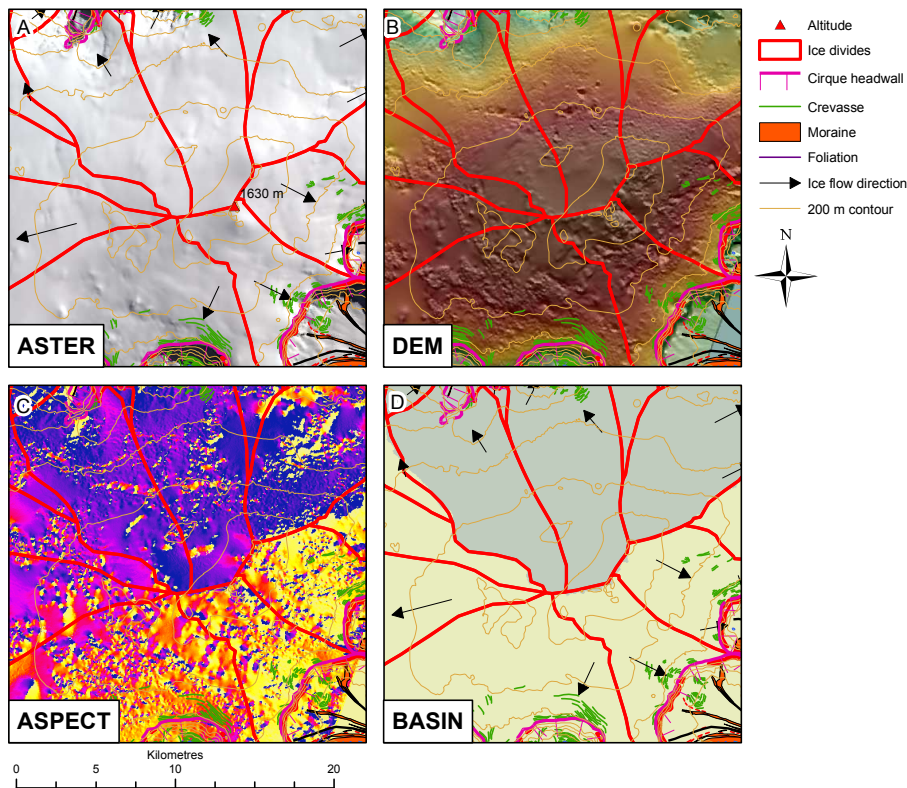

**Fig. S1.** Delineation of ice divides on the centre of James Ross Island, Mount Haddington Ice Cap. Delineation of ice divides used a combination of structural glaciological mapping from ASTER and SPOT-5 images (a), analysis of ASTER images and (b) the 2006 SPIRIT DEM showing high and low points and topographic divides, models of aspect (c) and slope, and (d) automatic drainage basin delineation using hydrological tools.

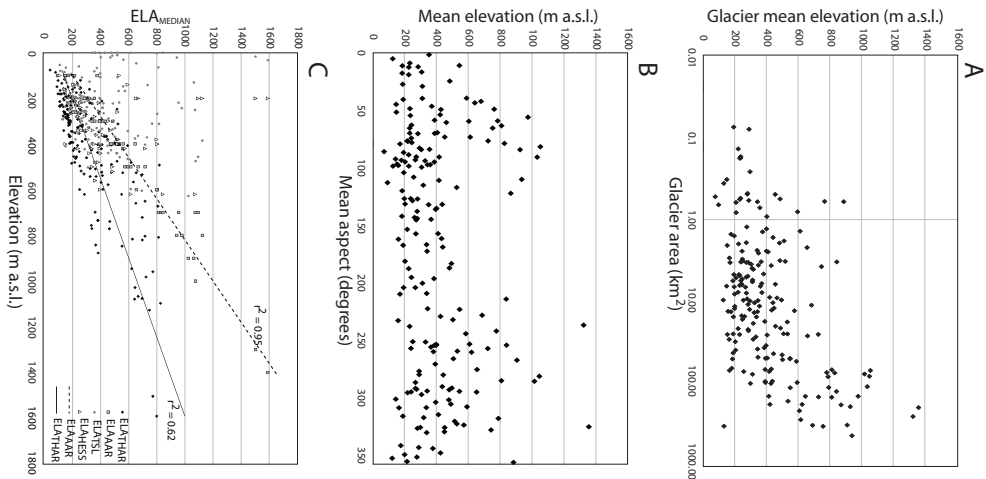

**Fig. S2.** Glacier inventory data. See Table 5 for p values. (a) Mean elevation and glacier area (log). (b) Correlation between ELA<sub>MEDIAN</sub> and different methods of ELA calculation. (c) Mean aspect and mean elevation.

**Table S1.** SPOT-5 and ASTER scenes used in the analysis of glacier change and estimates of cloud cover (visually estimated). TP = Trinity Peninsula. JRI = James Ross Island. VI = Vega Island.

| Sensor | Date       | Region             | Scene ID                                          | Path/Row | Cloud cover         |
|--------|------------|--------------------|---------------------------------------------------|----------|---------------------|
| SPOT-5 | 23/01/2006 | JRI                | GES 08-025 James Ross Island                      |          | 5%                  |
| SPOT-5 | 07/0/2006  | TP                 | SPI-09-049 Antarctic Peninsula                    |          | 5%                  |
| ASTER  | 06/02/2009 | Sjögren Glacier    | AST.L1A0032070439415,<br>AST.L1B00302062009130938 | 216/105  | 10-20%              |
| ASTER  | 03/03/2009 | JRI                | AST.L1A0032071357944,<br>AST.L1B00303032009130328 | 216/105  | 0%                  |
| ASTER  | 03/03/2009 | Joinville Island   | AST.L1A0032071358554,<br>AST.L1B00303032009130319 | 216/104  | 30%                 |
| ASTER  | 13/12/2008 | Joinville Island   | AST.L1A0032068532209,<br>AST.L1B00312132008130309 | 216/104  | 0%                  |
| ASTER  | 23/03/2008 | JRI and eastern TP | AST.L1A0032072667022,<br>AST.L1B00303232008130815 | 216/105  | 10%                 |
| ASTER  | 29/12/2002 | JRI                | AST.L1A0032010352317,<br>AST.L1B00312292002130340 | 216/105  | 50%                 |
| ASTER  | 29/12/2002 | Joinville Island   | AST.L1A0032010352317,<br>AST.L1B00312292002130340 | 216/104  | 40%                 |
| ASTER  | 05/03/2002 | Northern TP        | AST.L1A0032006163082,<br>AST.L1B00303052002132218 | 216/105  | 20% in NE corner    |
| ASTER  | 18/01/2002 | JRI and eastern TP | AST.L1A0032005839335,<br>AST.L1B00301182002131108 | 216/105  | 30% over western TP |
| ASTER  | 08/01/2001 | JRI                | AST.L1A0032004102903,<br>AST.L1B00301082001131449 | 216/105  | 0%                  |
| ASTER  | 14/02/2001 | TP                 | AST.L1A0032005033375,<br>AST.L1B0030214200113238  | 216/105  | 20% over the sea    |
| ASTER  | 15/11/2001 | Southern TP        | AST.L1A0032005556226,<br>AST.L1B00311152001131252 | 216/105  | Up to 50%           |
| ASTER  | 26/09/2001 | Western TP         | AST.L1A0032004337049,<br>AST.L1B00309262001132645 | 216/105  | 10%                 |

**Table S2.** Method for calculation of mean glacier aspect from a DEM using automatic methods in ArcGIS 9.3

| Step | Tool                                                                    | Method and notes                                                                                                                                                                                                                                                            |
|------|-------------------------------------------------------------------------|-----------------------------------------------------------------------------------------------------------------------------------------------------------------------------------------------------------------------------------------------------------------------------|
| 1.   | 3D Analyst → Surface analysis → Aspect                                  | Create a new model of aspect from the DEM ("apis_aspect")                                                                                                                                                                                                                   |
| 2.   | Data Management Tools → Raster → Raster Dataset → Create Raster Dataset | Create a new blank raster (e.g. "apis_blank")                                                                                                                                                                                                                               |
| 3.   | 3D Analyst → Reclassify                                                 | Reclassify each pixel value to 1 and save, e.g., "apis_reclass"                                                                                                                                                                                                             |
| 4.   | Spatial Analyst → Raster Calculator                                     | Apis_reclass = sin([apis_aspect] div deg). Export to geodatabase ("sine_aspect")                                                                                                                                                                                            |
| 6.   | Repeat for cosine                                                       | Create cosine model with mean values for each glacier. Join the tables.                                                                                                                                                                                                     |
| 7.   | Add field ("sine_div_c") → Field Calculator                             | Calculate mean_sine / mean_cos                                                                                                                                                                                                                                              |
| 8.   | Add Field ("angle") (set as double) → Field Calculator → "Advanced"     | <i>Pre-VBA Script Code:</i> Dim arctan as double. Arc-tan = Atn ([sine_div_c]). angle = arctan * 180 / 3.141592654.<br><i>Value Output:</i> angle                                                                                                                           |
| 9.   | Add Field (aspect_ang). Set as double. Field Calculator → "Advanced"    | <i>Pre-Logic VBA Script Code:</i> If [mean_sine] > 0 And [mean_cos] > 0 Then angle = [angle]. ElseIf [mean_cos] < 0 Then angle = [angle] + 180. ElseIf [mean_sine] < 0 And [mean_cos] > 0 Then angle = [angle] + 360. Else angle = -1. EndIf.<br><i>Value Output:</i> angle |
| 11.  | Join table to glacier polygons                                          | No fields should have a value of -1 (which is used as a check). Check by displaying angles as orientated arrows (Display - Quantities - Graduated Symbols).                                                                                                                 |
