# Supplementary material for: Variable glacier response to atmospheric warming, northern Antarctic Peninsula, 1988–2009
Source: Copernicus journal article supplement (doi:10.5194/tc-6-1031-2012), 2012-09-21
Supplement: Supplementary file 1 [file supplementary_data.xlsx]

## Sheet: Table_S2
	Analysis 1 (2009)				Analysis 2 (2001)				Analysis_3 (1997)		Analysis_4 (1988)					Time: analysis1_2	Time: analysis2_3	Time: analysis1_4	Time: analysis 1_4	Time: analysis 2_4		Area Change (km2)	Monthly rate of change (km2/month)	Annual recession rate 2001-2009 (km2 a-1)		Area Change (km2)	Monthly rate of change (km2/month)	Annual recession rate 1988-2009 (km2 a-1)		Area Change (km2)	Monthly rate of change (km2/month)	Annual recession rate 1997-2001 (km2 a-1)		Area Change (km2)	Monthly rate of change (km2/month)	Annual recession rate 1988-2001 (km2 a-1)		Difference in recession
glacier	date_acquired	Area_km2	buffer_error_km2	Error margin only km2	Date_acquired	Area_km2	Error margin only km2	buffer_error_km2	Date_acquired	Area_km2	Date_acquired	Area_km2	Error margin only km2	buffer_error_km2		months analysis 1 to analysis 2	Months analysis 2 to analysis 3	Months analysis 3 to analysis 4	Months analysis 1 to 4	Months analysis 2-4 1988 to 2001		Analysis 1 to 2	Analysis 1 to 2			Analysis 1 to 4	Analysis 1 to 4			Analysis 2 to 3	Analysis 2 to 3			Analysis 2 to 4	Analysis 2 to 4			1988-2001 and 2001-2009
CORRY_ISLAND	2009-03-03	3.24837	0.5	0.040989	2001-02-14	3.2871	0.037987	0.490366		0	1988-02-29	3.79542	0.682166	2.404		97			253	156		-0.038724	-0.000399216	-0.0047906		-0.547041	-0.00216222	-0.0259466						-0.508317	-0.00325844	-0.0391013		0.0343107
EAGLE_ISLAND	2009-03-03	24.573	1.8	0.247215	2001-02-14	24.573	0.70547	1.81209		0	1988-02-29	25.8653	2.06885	8.67491		97			253	156		0	0	0		-1.29236	-0.00510816	-0.0612979						-1.29236	-0.00828438	-0.0994126		0.0994126
LOCKYER	2006-01-07	10.7219	0.9	0.352042	2000-02-21	11.4802	0.417695	0.983809		0	1988-02-29	12.3742	1.40312	4.27499		71			215	144		-0.758288	-0.0106801	-0.128161		-1.65226	-0.00768495	-0.0922194						-0.893977	-0.00620817	-0.0744981		-0.0536633
SNOW_HILL	2006-01-07	326.118	3.6	3.32216	2000-02-21	341.307	3.6677	3.91091	1997-10-01	350.136	1988-02-29	358.257	18.0026	19.2449		71	28		215	144		-15.189	-0.213929	-2.56715		-32.1393	-0.149485	-1.79382		-8.8288	-0.315314	-3.78377		-16.9503	-0.117711	-1.41253		-1.15462
GAP01	2009-02-06	64.3386	1.5	0.773615	2000-02-21	68.7315	0.641133	1.59894	1997-10-01	67.2603	1988-02-29	84.4158	5.84774	9.66045		108	28		252	144		-4.3929	-0.040675	-0.4881		-20.0772	-0.0796714	-0.956057		1.47127	0.0525452	0.630542		-15.6843	-0.108919	-1.30702		0.818925
GAP02	2006-01-07	68.4537	2	0.700887	2000-02-21	72.0428	1.0737	2.10279	1997-10-01	68.8686	1988-02-29	72.1198	5.36623	10.3603		71	28		215	144		-3.58903	-0.0505497	-0.606596		-3.66609	-0.0170516	-0.204619		3.17414	0.113362	1.36035		-0.077065	-0.000535174	-0.00642208		-0.600174
GAP03	2009-02-06	41.8506	1.6	0.377202	2000-02-21	65.048	0.29418	1.87884	1997-10-01	60.3715	1988-02-29	74.0359	4.28799	10.4712		108	28		252	144		-23.1974	-0.214791	-2.57749		-32.1853	-0.127719	-1.53263		4.67654	0.167019	2.00423		-8.98786	-0.0624157	-0.748988		-1.8285
GAP04	2009-02-06	49.5886	1.9	0.753769	2000-02-21	63.0437	0.68355	2.0918	1997-10-01	62.6003	1988-02-29	87.7761	3.22534	9.66668		108	28		252	144		-13.4551	-0.124584	-1.49501		-38.1875	-0.151538	-1.81845		0.443421	0.0158365	0.190038		-24.7324	-0.171753	-2.06103		0.566022
GAP05	2009-02-06	140.975	2.3	0.786521	2000-02-21	150.294	0.96222	2.48308		0	1988-02-29	155.111	5.1669	12.7928		108			252	144		-9.31868	-0.0862841	-1.03541		-14.1355	-0.0560933	-0.673119						-4.81683	-0.0334502	-0.401402		-0.634007
GAP06	2009-02-06	44.245	1.5	0.199697	2000-02-21	45.1174	0.202906	1.51414		0	1990-02-09	56.1511	2.85513	9.37664		108			228	120		-0.872444	-0.00807819	-0.0969382		-11.9061	-0.0522198	-0.626638						-11.0337	-0.0919473	-1.10337		1.00643
GAP07	2006-01-07	426.538	9.1	0.701506	2000-02-21	429.042	0.703117	9.09011	1997-10-01	426.621	1990-02-09	466.447	4.06833	45.0679		71	28		191	120		-2.50361	-0.0352621	-0.423146		-39.9084	-0.208945	-2.50733		2.42082	0.0864579	1.0375		-37.4048	-0.311707	-3.74048		3.31733
GAP08	2009-02-06	98.5294	3.6	0.543637	2001-09-26	104.541	0.476871	3.97043	1997-10-01	111.384	1988-02-29	189.765	9.56292	28.6553		89	47		252	163		-6.01168	-0.0675469	-0.810563		-91.2355	-0.362046	-4.34455		-6.84289	-0.145593	-1.74712		-85.2238	-0.522846	-6.27415		5.46358
GAP09	2009-02-06	65.706	2.3	0.248375	2001-09-26	69.118	0.295933	2.33261	1997-10-01	69.7206	1988-02-29	93.6543	12.6602	22.7869		89	47		252	163		-3.412	-0.0383371	-0.460045		-27.9483	-0.110906	-1.33087		-0.602521	-0.0128196	-0.153835		-24.5363	-0.150529	-1.80635		1.34631
GAP10	2009-02-06	12.3722	1.1	0.14506	2001-09-26	15.5674	0.416861	1.35507	1997-10-01	14.8615	1988-02-29	14.8428	1.36097	5.91954		89	47	116	252	163		-3.19528	-0.035902	-0.430824		-2.47064	-0.00980413	-0.11765		0.70592	0.0150196	0.180235		0.724637	0.00444563	0.0533475		-0.484172
GAP11	2009-02-06	49.5831	2.4	0.092291	2001-09-26	56.9323	0.612613	2.99086	1997-10-01	57.9698	1988-02-29	107.21	17.2145	28.8885		89	47		252	163		-7.34922	-0.0825755	-0.990906		-57.6273	-0.22868	-2.74416		-1.03754	-0.0220753	-0.264904		-50.2781	-0.308455	-3.70145		2.71055
GAP12	2009-02-06	188.928	9.2	0.174286	2001-09-26	206.395	0.64432	9.75387	1997-10-01	210.971	1988-02-29	382.017	23.397	67.8901		89	47		252	163		-17.4667	-0.196256	-2.35507		-193.089	-0.766225	-9.19471		-4.57544	-0.0973498	-1.1682		-175.622	-1.07744	-12.9292		10.5742
GAP13	2009-02-06	68.5682	3.1	0.085298	2001-09-26	79.3	0.472065	3.58699	1997-10-01	81.7101	1988-02-29	123.123	15.1799	29.8502		89	47		252	163		-10.7318	-0.120582	-1.44698		-54.5549	-0.216488	-2.59785		-2.41017	-0.0512803	-0.615364		-43.8232	-0.268854	-3.22625		1.77927
GAP14	2009-02-06	107.827	3.3	0.22305	2001-09-26	114.871	0.364787	3.43842	1997-10-01	118.951	1988-02-29	172.93	15.0736	30.0884		89	47		252	163		-7.04479	-0.0791549	-0.949859		-65.1031	-0.258346	-3.10015		-4.07952	-0.0867983	-1.04158		-58.0583	-0.356186	-4.27423		3.32437
GAP15	2009-02-06	327.782	5.6	1.35544	2001-09-26	330.206	2.42377	5.68723	1997-10-01	332.617	1988-02-29	465.535	12.2781	33.8309		89	47		252	163		-2.42416	-0.0272377	-0.326852		-137.753	-0.54664	-6.55968		-2.41101	-0.051298	-0.615577		-135.329	-0.83024	-9.96288		9.63603
GAP16	2009-02-06	67.2005	3.2	0.182418	2001-09-26	67.177	0.179632	3.19202	1997-10-01	68.8043	1988-02-29	67.8555	0.90741	15.7989		89	47		252	163		0.023526	0.000264337	0.00317204		-0.654975	-0.00259911	-0.0311893		-1.62725	-0.0346224	-0.415469		-0.678501	-0.00416258	-0.049951		0.053123
GAP17	2009-02-06	141.134	4.5	0.203387	2001-09-26	141.134	0.431408	4.45907	1997-10-01	143.98	1988-02-29	142.63	2.20314	22.1027		89	47		252	163		0	0	0		-1.49642	-0.00593817	-0.0712581		-2.8465	-0.0605639	-0.726767		-1.49642	-0.00918049	-0.110166		0.110166
GAP18	2009-02-06	143.803	3.4	0.503031	2001-09-26	145.416	0.629468	3.47319	1997-10-01	145.106	1988-02-29	147.215	2.76507	16.9512		89	47		252	163		-1.6128	-0.0181213	-0.217456		-3.41187	-0.0135392	-0.16247		0.310204	0.00660009	0.079201		-1.79907	-0.0110372	-0.132447		-0.0850086
GAP19	2008-03-23	48.7144	2.2	0.366519	2001-09-26	48.89	0.403578	2.20379	1997-10-01	49.2539	1988-02-29	50.5641	1.86579	10.6715		78	47		241	163		-0.175633	-0.00225171	-0.0270205		-1.84973	-0.00767524	-0.0921029		-0.363935	-0.0077433	-0.0929196		-1.6741	-0.0102706	-0.123247		0.0962262
GAP20	2008-03-23	141.253	4.6	0.315999	2001-02-14	141.552	0.438413	4.57996	1997-10-01	142.245	1988-02-29	142.186	1.6139	22.6388		85	40		241	156		-0.29859	-0.00351282	-0.0421539		-0.932676	-0.00387002	-0.0464403		-0.693655	-0.0173414	-0.208097		-0.634086	-0.00406465	-0.0487758		0.00662196
GAP21	2009-03-03	19.8009	1.3	0.061686	2001-02-14	19.9122	0.067001	1.3155		0	1988-02-29	20.0359	0.36699	6.46836		97			253	156		-0.111278	-0.0011472	-0.0137664		-0.235043	-0.000929024	-0.0111483						-0.123765	-0.000793365	-0.00952038		-0.00424597
GAP22	2008-03-23	98.4283	3.6	0.391361	2001-02-14	99.1046	0.579775	3.57812		0	1988-02-29	99.725	1.99316	17.7716		85			241	156		-0.676336	-0.00795689	-0.0954827		-1.29675	-0.0053807	-0.0645684						-0.620413	-0.00397701	-0.0477241		-0.0477587
GAP23	2008-03-23	272.626	5.5	0.711095	2001-02-14	273.242	1.20416	5.48957		0	1988-02-29	275.013	3.74814	26.7562		85			241	156		-0.615794	-0.00724464	-0.0869356		-2.38745	-0.00990644	-0.118877						-1.77166	-0.0113568	-0.136281		0.0493457
GAP24	2009-03-03	15.0666	0.8	0.07247	2001-02-14	15.0666	0.065362	0.809245		0	1988-02-29	15.9893	0.391177	3.87095		97			253	156		0	0	0		-0.922726	-0.00364714	-0.0437657						-0.922726	-0.00591491	-0.0709789		0.0709789
GAP25	2008-03-23	21.1618	0.9	0.197329	2001-02-14	21.54	0.212179	0.926373		0	1988-02-29	22.7081	1.08182	4.70084		85			241	156		-0.378191	-0.00444931	-0.0533917		-1.54636	-0.00641644	-0.0769973						-1.16817	-0.00748828	-0.0898594		0.0364677
GAP26	2009-03-03	13.0435	0.8	0.141907	2001-02-14	13.2286	0.244115	0.80465		0	1988-02-29	14.8352	0.989535	4.21102		97			253	156		-0.185068	-0.00190792	-0.022895		-1.79166	-0.00708165	-0.0849798						-1.60659	-0.0102986	-0.123584		0.100689
GAP27	2009-03-03	2.91911	0.5		2001-02-14	3.11901	0.149601	0.526835		0	1988-02-29	4.3508	0.335118	2.39495		97			253	156		-0.199896	-0.00206078	-0.0247294		-1.43168	-0.00565883	-0.067906						-1.23179	-0.00789608	-0.0947529		0.0700235
GAP28	2009-03-03	0.524261	0.1		2001-02-14	0.588201		0.138301		0	1988-02-29	0.816216	0.352351	0.891219		97			253	156		-0.06394	-0.000659175	-0.0079101		-0.291955	-0.00115397	-0.0138477						-0.228015	-0.00146163	-0.0175396		0.00962951
GAP29	2009-03-03	0.323701	0.1		2001-02-14	0.323701		0.098807		0	1988-02-29	0.46903	0.17758	0.580254		97			253	156		0	0	0		-0.145329	-0.000574423	-0.00689308						-0.145329	-0.000931596	-0.0111792		0.0111792
GAP30	2009-03-03	95.932	2.8	0.257357	2001-02-14	97.0299	0.244708	2.82402	1997-10-01	97.4107	1988-02-29	100.522	1.53673	14.5775		97	40		253	156		-1.09793	-0.0113189	-0.135826		-4.59029	-0.0181435	-0.217722		-0.380747	-0.00951867	-0.114224		-3.49236	-0.022387	-0.268643		0.132817
GAP31	2009-03-03	212.183	3.9	0.215948	2001-02-14	212.587	0.206604	3.89373	1997-10-01	213.402	1988-02-29	213.603	1.30176	19.2751		97	40		253	156		-0.404126	-0.00416625	-0.049995		-1.41962	-0.00561113	-0.0673336		-0.814956	-0.0203739	-0.244487		-1.01549	-0.00650955	-0.0781146		0.0281196
GAP32	2009-03-03	93.4358	2.3	0.383475	2001-02-14	93.9171	0.894532	2.3399		0	1988-02-29	95.7184	2.26089	12.0115		97			253	156		-0.481322	-0.00496208	-0.059545		-2.28258	-0.00902206	-0.108265						-1.80126	-0.0115465	-0.138558		0.0790133
GAP33	2009-03-03	28.5383	1.6	0.386221	2001-02-14	30.2517	0.360911	1.66607	1997-10-01	29.3989	1988-02-29	31.6626	1.49145	8.45871		97	40		253	156		-1.71337	-0.0176636	-0.211963		-3.1243	-0.012349	-0.148188		0.85283	0.0213208	0.255849		-1.41093	-0.00904441	-0.108533		-0.10343
GAP34	2009-03-03	177.178	3.2	0.416833	2001-02-14	179.742	0.397796	3.23333	1997-10-01	183.809	1988-02-29	188.139	1.98615	16.4773		97	40		253	156		-2.56392	-0.0264321	-0.317186		-10.9607	-0.0433228	-0.519873		-4.06723	-0.101681	-1.22017		-8.39674	-0.0538253	-0.645903		0.328718
GAP35	2009-03-03	48.3066	1.6	0.373891	2001-02-14	48.3556	0.375436	1.64214		0	1988-02-29	49.8561	2.01957	8.38046		97			253	156		-0.049009	-0.000505247	-0.00606297		-1.54951	-0.00612456	-0.0734947						-1.5005	-0.00961862	-0.115423		0.10936
GAP36	2009-03-03	21.7425	1.3	0.168691	2002-12-29	22.7107	0.165991	1.25843		0	1988-02-29	23.4684	0.889006	6.38037		75			253	178		-0.968289	-0.0129105	-0.154926		-1.72598	-0.00682207	-0.0818649						-0.757695	-0.00425671	-0.0510806		-0.103846
GAP37	2009-03-03	12.0816	0.7	0.219682	2002-12-29	12.3817	0.219653	0.732987		0	1988-02-29	14.0001	1.1348	3.88019		75			253	178		-0.300028	-0.00400037	-0.0480045		-1.91852	-0.00758307	-0.0909969						-1.61849	-0.00909263	-0.109112		0.0611071
GAP38	2009-03-03	24.9963	1.1	0.273355	2002-12-29	25.7081	0.261365	1.06837		0	1988-02-29	28.0315	1.1908	5.39929		75			253	178		-0.711844	-0.00949125	-0.113895		-3.03523	-0.0119969	-0.143963						-2.32338	-0.0130527	-0.156632		0.0427374
GAP39	2009-03-03	76.146	1.8	0.97707	2002-01-18	77.2505	1.16016	1.84267		0	1988-02-29	79.5148	3.93101	9.54282		86			253	167		-1.10452	-0.0128433	-0.154119		-3.36877	-0.0133153	-0.159783						-2.26425	-0.0135584	-0.1627		0.00858089
GAP40	2009-03-03	114.285	2.1	1.29953	2002-12-29	116.127	1.33254	2.12154		0	1988-02-29	122.752	7.00562	11.1713		75			253	178		-1.84186	-0.0245582	-0.294698		-8.46741	-0.033468	-0.401616						-6.62555	-0.0372222	-0.446666		0.151968
GAP41	2008-12-13	38.7302	1.2	0.300663	2002-12-29	39.481	0.3244	1.2735		0	1988-02-29	42.1251	1.85791	6.60954		72			250	178		-0.75074	-0.0104269	-0.125123		-3.3949	-0.0135796	-0.162955						-2.64416	-0.0148548	-0.178258		0.0531344
GAP42	2008-03-23	16.358	0.8	0.167517	2002-12-29	16.6313	0.167156	0.840295		0	1988-02-29	16.9515	0.827416	4.21386		63			241	178		-0.273245	-0.00433722	-0.0520467		-0.593486	-0.0024626	-0.0295512						-0.320241	-0.00179911	-0.0215893		-0.0304574
GAP43	2008-03-23	27.0868	1	0.408008	2002-12-29	27.7268	0.425985	1.04759		0	1988-02-29	27.8848	2.23629	5.18342		63			241	178		-0.640035	-0.0101593	-0.121911		-0.798044	-0.00331139	-0.0397366						-0.158009	-0.000887691	-0.0106523		-0.111259
GAP44	2008-12-13	4.6554	0.7	0.052876	2002-12-29	4.71665	0.129073	0.668794		0	1988-02-29	4.88043	0.31226	3.21226		72			250	178		-0.061251	-0.000850708	-0.0102085		-0.225029	-0.000900116	-0.0108014						-0.163778	-0.000920101	-0.0110412		0.000832713
GAP45	2006-01-07	161.875	3	0.541458	2001-02-14	161.944	0.562813	3.0073		0	1988-02-29	163.73	3.05674	15.0663		59			215	156		-0.069095	-0.0011711	-0.0140532		-1.85483	-0.0086271	-0.103525						-1.78573	-0.011447	-0.137364		0.123311
GAP46	2006-01-07	34.0486	1.3	0.21522	2001-02-14	34.1984	0.218111	1.31835		0	1988-02-29	34.1869	1.09138	6.5664		59			215	156		-0.149857	-0.00253995	-0.0304794		-0.138372	-0.000643591	-0.00772309						0.011485	7.36218e-05	0.000883462		-0.0313629
GAP47	2008-12-23	25.3423	1.4	0.361457	2001-02-14	25.498	0.352171	1.44346		0	1988-02-29	26.2596	1.9917	7.30235		94			250	156		-0.155754	-0.00165696	-0.0198835		-0.917292	-0.00366917	-0.04403						-0.761538	-0.00488165	-0.0585798		0.0386964
GAP48	2006-01-07	15.2095	0.7	0.712884	2001-02-14	15.405	0.74313	0.76292		0	1988-02-29	15.8488	3.62885	3.74384		59			215	156		-0.195498	-0.00331353	-0.0397623		-0.639375	-0.00297384	-0.035686						-0.443877	-0.00284537	-0.0341444		-0.00561792
GAP49	2008-03-23	48.705	2.1	0.085735	2001-02-14	48.7416		2.14676		0	1988-02-29	48.9819	0.423708	10.4761		85			241	156		-0.036602	-0.000430612	-0.00516734		-0.276917	-0.00114903	-0.0137884						-0.240315	-0.00154048	-0.0184858		0.0133184
GAP50	2008-03-23	47.2086	2.1	0.441496	2001-09-26	47.4939	0.4608	2.14226		0	1988-02-29	47.1678	2.29274	10.5718		78			241	163		-0.285378	-0.00365869	-0.0439043		0.040735	0.000169025	0.0020283						0.326113	0.00200069	0.0240083		-0.0679126
GAP51	2008-03-23	144.964	2.9	0.350722	2001-02-14	145.179	0.359825	2.8901		0	1988-02-29	145.377	1.80034	14.4214		85			241	156		-0.215578	-0.00253621	-0.0304345		-0.413281	-0.00171486	-0.0205783						-0.197703	-0.00126733	-0.0152079		-0.0152266
GAP52	2006-01-07	50.5822	1.5	0.212633	2001-02-14	50.8143	0.215411	1.47837		0	1988-02-29	50.7611	1.09758	7.37371		59			215	156		-0.232083	-0.00393361	-0.0472033		-0.178951	-0.00083233	-0.00998796						0.053132	0.00034059	0.00408708		-0.0512904
GAP53	2006-01-07	177.337	3.3	0.71084		0				0	1990-02-09	177.992	3.73106	16.5719					191							-0.655192	-0.00343032	-0.0411639
GAP54	2006-01-07	66.6549	1.6	0.709527		0				0	1990-02-09	67.0149	3.64546	8.35567					191							-0.35999	-0.00188476	-0.0226172
GAP55	2006-01-07	318.474	4	0.338504	2001-09-26	318.447	0.336792	4.00127		0	1990-02-09	318.447	2.57241	20.0541		52			191	139		0.027068	0.000520538	0.00624646		0.027068	0.000141717	0.00170061						0	0	0		0.00624646
GAP56	2006-01-07	316.598	5.4	0.557871	2001-09-26	316.6	0.559079	5.4459		0						52						-0.001667	-3.20577e-05	-0.000384692
GAP57	2006-01-07	70.438	2	0.751	2001-09-26	70.438	0.750717	1.99734		0						52						0	0	0
GAP58	2006-01-07	111.129	2.6	0.79647	2001-09-26	111.501	0.790908	2.63696		0						52						-0.372349	-0.00716056	-0.0859267
GAP59	2006-01-07	53.0577	1.6	0.73903	2001-09-26	52.9741	0.718805	1.57066		0	1990-02-09	53.0674	3.60325	7.79485		52			191	139		0.083692	0.00160946	0.0193135		-0.009648	-5.05131e-05	-0.000606157						-0.09334	-0.000671511	-0.00805813		0.0273717
GAP60	2006-01-07	249.448	4.2	0.339668	2001-09-26	249.61	0.344557	4.23188		0	1989-11-05	249.736	1.97907	21.2904		52			194	142		-0.162005	-0.00311548	-0.0373858		-0.287974	-0.0014844	-0.0178128						-0.125969	-0.000887106	-0.0106453		-0.0267405
GAP61	2006-01-07	193.814	4.9	0.148739	2001-09-26	193.814	0.160617	4.85343		0	1990-02-09	193.837	0.824905	23.7697		52			191	139		0	0	0		-0.022436	-0.000117466	-0.00140959						-0.022436	-0.00016141	-0.00193692		0.00193692
GAP62	2006-01-07	9.49525	1.2	0.281405	2001-09-26	9.76854	0.288342	1.24419		0						52						-0.273294	-0.00525565	-0.0630678
GIJR01	2009-03-03	0.55851	0.1	0.054769	2001-01-08	0.678033	0.061666	0.142085		0	1988-02-29	1.10551	0.485841	0.912464		98			253	155		-0.119523	-0.00121962	-0.0146355		-0.547002	-0.00216206	-0.0259448						-0.427479	-0.00275793	-0.0330951		0.0184597
GIJR02	2009-03-03	0.170308	0.1		2001-01-08	0.170308	0.018706	0.074548		0	1988-02-29	0.293987	0.32963	0.49912		98			253	155		0		0		-0.123679	-0.00048885	-0.0058662						-0.123679	-0.000797929	-0.00957515		0.00957515
GIJR03	2009-03-03	0.074401	0		2001-01-08	0.074401		0.049855		0	1988-02-29	0.101912	0.182929	0.294725		98			253	155		0		0		-0.027511	-0.000108739	-0.00130487						-0.027511	-0.00017749	-0.00212988		0.00212988
GIJR04	2009-03-03	3.21379	0.4	0.072235	2001-01-08	3.25931	0.07445	0.438326		0	1988-02-29	3.46653	0.446848	2.41699		98			253	155		-0.045519	-0.00046448	-0.00557376		-0.252737	-0.00099896	-0.0119875						-0.207218	-0.00133689	-0.0160427		0.0104689
GIJR05	2009-03-03	0.079009	0		2001-01-08	0.079009		0.048642		0	1988-02-29	0.120257	0.243958	0.296177		98			253	155		0	0	0		-0.041248	-0.000163036	-0.00195643						-0.041248	-0.000266116	-0.00319339		0.00319339
GIJR08	2009-03-03	0.546587	0.2		2001-02-14	0.546587		0.18099		0	1988-02-29	0.660744	0.450937	0.957278		97			253	156		0	0	0		-0.114157	-0.000451213	-0.00541456						-0.114157	-0.000731776	-0.00878131		0.00878131
GIJR10	2009-03-03	0.487521	0.1	0.080822	2001-02-14	0.487521		0.132632		0	1988-02-29	0.513471	0.332079	0.694949		97			253	156		0	0	0		-0.02595	-0.000102569	-0.00123083						-0.02595	-0.000166346	-0.00199615		0.00199615
GIJR100	2009-03-03	15.2543	0.9	0.144607	2001-01-08	15.4599	0.146349	0.925915	1997-10-01	15.1405	1988-02-29	42.9241	4.98504	8.86671		98	39		253	155		-0.20566	-0.00209857	-0.0251829		-27.6698	-0.109367	-1.3124		0.319432	0.00819056	0.0982868		-27.4642	-0.177188	-2.12626		2.10108
GIJR103	2009-02-06	0.657824	0.2	0.040384	2000-02-21	0.870056	0.050263	0.185697		0			0.467291			108						-0.212232	-0.00196511	-0.0235813
GIJR104	2009-02-06	9.64292	0.9	0.246241	2000-02-21	10.408	0.163965	0.821234		0	1988-02-29	10.6673	0.780698	4.47284		108			252	144		-0.765084	-0.00708411	-0.0850093		-1.02441	-0.00406512	-0.0487815						-0.259327	-0.00180088	-0.0216106		-0.0633987
GIJR105	2009-02-06	0.818122	0.2	0.065886	2000-02-21	1.05309	0.058975	0.236136	1997-10-01	0.991717	1988-02-29	1.12368	0.527924	1.11684		108	28		252	144		-0.234973	-0.00217568	-0.0261081		-0.305561	-0.00121254	-0.0145505		0.061378	0.00219207	0.0263049		-0.070588	-0.000490194	-0.00588233		-0.0202258
GIJR106	2009-02-06	22.4601	1.2	0.109222	2000-02-21	22.9406	0.167533	1.22319	1997-10-01	23.6909	1988-02-29	25.224	1.44047	6.26797		108	28		252	144		-0.480574	-0.00444976	-0.0533971		-2.76398	-0.0109682	-0.131618		-0.750298	-0.0267964	-0.321556		-2.28341	-0.015857	-0.190284		0.136887
GIJR107	2009-02-06	17.3166	1.2	0.179112	2000-02-21	17.4674	0.135661	1.15803		0	1988-02-29	18.1333	0.851332	6.01285		108			252	144		-0.150859	-0.00139684	-0.0167621		-0.816741	-0.00324104	-0.0388924						-0.665882	-0.00462418	-0.0554902		0.0387281
GIJR108	2009-03-03	92.4165	2.1	0.421127	2000-02-21	96.0168	0.383459	2.10475	1997-10-01	97.657	1988-02-29	104.498	2.36356	10.4882		109	28		253	144		-3.60024	-0.0330297	-0.396357		-12.0818	-0.0477542	-0.57305		-1.64022	-0.0585793	-0.702951		-8.48156	-0.0588997	-0.706797		0.31044
GIJR109	2009-03-03	12.6065	1	0.264398	2001-01-08	12.6065	0.263711	0.952207		0	1988-02-29	13.85	1.43269	4.23114		98			253	155		0	0	0		-1.24345	-0.00491482	-0.0589779						-1.24345	-0.00802226	-0.0962671		0.0962671
GIJR110	2009-02-06	1.49984	0.5	0.017727		0				0	1988-02-29	2.35896	1.10154	2.14823					252							-0.859121	-0.00340921	-0.0409105
GIJR111	2006-01-07	2.05442	0.4	0.072223	2000-02-21	2.42776	0.118138	0.435814		0	1988-02-29	2.50413	0.715826	1.83083		71			215	144		-0.373345	-0.00525838	-0.0631006		-0.449714	-0.00209169	-0.0251003						-0.076369	-0.00053034	-0.00636408		-0.0567365
GIJR112	2006-01-07	6.56254	0.6	0.060482	2000-02-21	6.66719	0.085153	0.570126		0	1988-02-29	7.01613	0.576672	2.67921		71			215	144		-0.104647	-0.0014739	-0.0176868		-0.453587	-0.00210971	-0.0253165						-0.34894	-0.00242319	-0.0290783		0.0113915
GIJR113	2006-01-07	11.369	0.9	0.206152	2000-02-21	11.846	0.25112	0.936349	1997-10-01	12.3031	1988-02-29	12.9264	1.4287	4.18997		71	28		215	144		-0.476977	-0.00671799	-0.0806158		-1.55742	-0.00724383	-0.086926		-0.457137	-0.0163263	-0.195916		-1.08045	-0.0075031	-0.0900372		0.00942142
GIJR114	2006-01-07	10.2477	0.9	0.065672	2000-02-21	10.6048	0.088354	0.876574		0	1988-02-29	11.8657	1.03851	4.35787		71			215	144		-0.35711	-0.00502972	-0.0603566		-1.61801	-0.0075256	-0.0903073						-1.2609	-0.00875622	-0.105075		0.044718
GIJR115	2009-03-03	179.77	4.1	0.359595	2001-01-08	183.698	0.34015	4.07329	1997-10-01	185.428	1988-02-29	190.545	1.56006	19.8254		98	39		253	155		-3.92773	-0.0400788	-0.480946		-10.7747	-0.0425879	-0.511055		-1.73039	-0.0443689	-0.532427		-6.84701	-0.0441743	-0.530091		0.0491452
GIJR116	2009-03-03	7.7147	0.9	0.032151	2001-01-08	7.7147	0.061846	0.91258		0	1988-02-29	7.7147	1.21501	4.55766		98			253	155		0	0	0		0	0	0						0	0	0		0
GIJR117	2009-03-03	26.67	1.1	0.180298	2001-09-26	27.6481	0.21424	1.14908	1997-10-01	28.8693	1988-02-29	29.1679	1.59817	5.93712		90	47		253	163		-0.978136	-0.0108682	-0.130418		-2.49792	-0.00987319	-0.118478		-1.22118	-0.0259826	-0.311792		-1.51978	-0.0093238	-0.111886		-0.0185325
GIJR118	2009-03-03	17.5776	1.3	0.210312	2001-01-08	18.3	0.176518	1.29493		0	1988-02-29	18.7953	1.61249	6.43838		98			253	155		-0.72247	-0.00737214	-0.0884657		-1.21771	-0.00481309	-0.0577571						-0.495243	-0.00319512	-0.0383414		-0.0501243
GIJR118A	2009-03-03	3.71999	0.6	0.14551	2001-01-08	3.76298	0.178774	0.573939		0	1988-02-29	3.80579		2.87278		98			253	155		-0.042985	-0.000438622	-0.00526347		-0.085795	-0.000339111	-0.00406933						-0.04281	-0.000276194	-0.00331432		-0.00194915
GIJR119	2009-03-03	13.5062	0.8	0.079681	2001-01-08	14.0777	0.093185	0.782594		0	1988-02-29	14.9326	1.13882	4.09758		98			253	155		-0.571466	-0.00583129	-0.0699754		-1.42643	-0.00563805	-0.0676566						-0.854961	-0.00551588	-0.0661905		-0.0037849
GIJR120	2009-03-03	2.40873	0.4	0.184635	2001-01-08	2.40873	0.159215	0.436387		0	1988-02-29	2.44723	0.970023	2.15166		98			253	155		0		0		-0.038496	-0.000152158	-0.0018259						-0.038496	-0.000248361	-0.00298034		0.00298034
GIJR120A	2009-03-03	0.564575	0.1	0.015063	2001-01-08	0.564575	0.015063	0.140692		0	1988-02-29	0.564575	0.364836	0.701266		98			253	155		0	0	0		0	0	0						0	0	0		0
GIJR121	2009-03-03	6.43172	0.6	0.070502	2001-01-08	7.22463	0.108589	0.676747	1997-10-01	7.87501	1988-02-29	8.13036	1.21516	3.67026		98	39		253	155		-0.792908	-0.0080909	-0.0970908		-1.69864	-0.006714	-0.080568		-0.650383	-0.0166765	-0.200118		-0.905735	-0.00584345	-0.0701214		-0.0269694
GIJR121A	2009-03-03	0.714513	0.2		2001-01-08	0.736108	0.042296	0.193341		0	1988-02-29	1.00346	0.537372	1.1246		98			253	155		-0.021595	-0.000220357	-0.00264429		-0.28895	-0.00114209	-0.0137051						-0.267355	-0.00172487	-0.0206985		0.0180542
GIJR122	2009-03-03	5.42026	0.6	0.062463	2001-01-08	5.42026	0.090412	0.563076		0	1988-02-29	8.30549	1.41229	2.81005		98			253	155		0		0		-2.88523	-0.0114041	-0.136849						-2.88523	-0.0186144	-0.223373		0.223373
GIJR123	2009-03-03	81.701	3.1	0.118166	2001-01-08	82.2781	0.121621	3.07732	1997-10-01	82.9839	1988-02-29	84.1208	1.11961	14.9824		98	39		253	155		-0.577081	-0.00588858	-0.070663		-2.41977	-0.00956432	-0.114772		-0.705889	-0.0180997	-0.217197		-1.84269	-0.0118883	-0.14266		0.0719971
GIJR123A	2009-03-03	6.09365	0.9	0.039491	2001-01-08	6.21039	0.039535	0.917097	1997-10-01	5.69587	1988-02-29	6.80544	0.586964	4.24298		98	39		253	155		-0.116736	-0.00119118	-0.0142942		-0.711794	-0.00281342	-0.033761		0.514518	0.0131928	0.158313		-0.595058	-0.00383908	-0.046069		0.0317748
GIJR124	2009-03-03	73.3213	2.9	0.122035	2001-01-08	72.8653	0.114312	2.85818	1997-10-01	73.799	1988-02-29	74.9413	1.26579	13.9093		98	39		253	155		0.455988	0.00465294	0.0558353		-1.61998	-0.00640309	-0.0768371		-0.93366	-0.02394	-0.28728		-2.07597	-0.0133934	-0.16072		0.216556
GIJR125	2009-03-03	8.96135	1	0.064408	2001-01-08	8.96135	0.082233	1.02822		0	1988-02-29	9.92089	0.735344	5.44906		98			253	155		0	0	0		-0.959541	-0.00379265	-0.0455118						-0.959541	-0.00619059	-0.074287		0.074287
GIJR126	2006-01-07	3.90076	0.7	0.030752	2001-01-08	3.96939	0.049087	0.713326		0	1988-02-29	5.11489	1.14715	3.66698		60			215	155		-0.068631	-0.00114385	-0.0137262		-1.21413	-0.00564712	-0.0677655						-1.1455	-0.00739032	-0.0886839		0.0749577
GIJR126A	2006-01-07	1.90084	0.5	0.02627	2001-01-08	1.92027	0.017335	0.457543		0	1988-02-29	1.96262	0.186635	2.2855		60			215	155		-0.019426	-0.000323767	-0.0038852		-0.06178	-0.000287349	-0.00344819						-0.042354	-0.000273252	-0.00327902		-0.000606181
GIJR127	2009-03-03	5.00151	0.7	0.030684	2001-01-08	5.02996	0.032235	0.677711		0	1988-02-29	6.11116	1.42246	3.63613		98			253	155		-0.028448	-0.000290286	-0.00348343		-1.10966	-0.00438599	-0.0526319						-1.08121	-0.00697554	-0.0837064		0.080223
GIJR127A	2006-01-07	1.29159	0.2		2001-01-08	1.36038	0.104866	0.210368		0	1988-02-29	2.15403	0.869045	1.3543		60			215	155		-0.068796	-0.0011466	-0.0137592		-0.862447	-0.00401138	-0.0481366						-0.793651	-0.00512033	-0.0614439		0.0476847
GIJR128	2009-03-03	96.0558	4.9	0.228679	2001-01-08	98.7198	0.236633	5.09061	1997-10-01	101.123	1988-02-29	104.817	0.9869	23.2179		98	39		253	155		-2.66402	-0.0271839	-0.326207		-8.76089	-0.034628	-0.415536		-2.40369	-0.0616331	-0.739597		-6.09687	-0.0393346	-0.472016		0.145809
GIJR129	2009-03-03	3.3201	0.4	0.055113	2001-01-08	3.37576	0.024643	0.375996		0	1988-02-29	3.87935		2.33072		98			253	155		-0.055661	-0.000567969	-0.00681563		-0.559242	-0.00221044	-0.0265253						-0.503581	-0.00324891	-0.0389869		0.0321713
GIJR129A	2009-03-03	2.41202	0.4	0.023792	2001-01-08	2.41202	0.023792	0.384381		0	1988-02-29	2.46967	0.278942	1.8846		98			253	155		0	0	0		-0.057646	-0.00022785	-0.0027342						-0.057646	-0.00037191	-0.00446292		0.00446292
GIJR130	2009-03-03	0.26055	0.1		2001-02-14	0.279267		0.097838		0	1988-02-29	0.353317	0.3149	0.57396		97			253	156		-0.018717	-0.000192959	-0.00231551		-0.092767	-0.000366668	-0.00440002						-0.07405	-0.000474679	-0.00569615		0.00338065
GIJR131	2009-03-03	5.52577	0.6	0.066705	2001-01-08	5.66975	0.05866	0.644796		0	1988-02-29	6.69022	0.621861	3.38473		98			253	155		-0.143983	-0.00146921	-0.0176306		-1.16445	-0.00460256	-0.0552307						-1.02046	-0.00658364	-0.0790037		0.0613731
GIJR132	2009-03-03	7.6294	0.7	0.084884	2001-01-08	7.98919	0.121561	0.723305	1997-10-01	8.20971	1988-02-29	8.97227	0.823837	3.79572		98	39		253	155		-0.359786	-0.00367129	-0.0440554		-1.34287	-0.00530779	-0.0636934		-0.220524	-0.00565446	-0.0678535		-0.983084	-0.00634248	-0.0761097		0.0320543
GIJR133	2009-03-03	3.31221	0.5	0.08435	2001-01-08	3.42895	0.087134	0.500735		0	1988-02-29	4.57234	0.57214	2.05445		98			253	155		-0.116737	-0.00119119	-0.0142943		-1.26013	-0.00498075	-0.059769						-1.14339	-0.00737673	-0.0885207		0.0742264
GIJR134	2009-03-03	10.27	0.8	0.077651	2001-01-08	10.7086	0.103485	0.840331	1997-10-01	10.5336	1988-02-29	11.4677	0.574614	4.22517		98	39		253	155		-0.438589	-0.0044754	-0.0537048		-1.19772	-0.00473405	-0.0568086		0.175057	0.00448864	0.0538637		-0.759126	-0.00489759	-0.058771		0.00506627
GIJR135	2009-03-03	0.603911	0.2		2001-01-08	0.709159	0.11014	0.216862		0	1988-02-29	0.804858		1.19322		98			253	155		-0.105248	-0.00107396	-0.0128875		-0.200947	-0.000794257	-0.00953108						-0.095699	-0.000617413	-0.00740895		-0.00547856
GIJR136	2009-03-03	110.307	2.5	0.123411	2001-01-08	110.747	0.16463	2.5953		0	1988-02-29	111.497	0.699852	12.9757		98			253	155		-0.439713	-0.00448687	-0.0538424		-1.18942	-0.00470125	-0.056415						-0.749703	-0.00483679	-0.0580415		0.00419911
GIJR137	2009-03-03	24.5899	1.2	0.258369	2001-01-08	24.7874	0.305917	1.21186		0	1988-02-29	25.143	1.26308	5.95394		98			253	155		-0.197446	-0.00201476	-0.0241771		-0.55304	-0.00218593	-0.0262311						-0.355594	-0.00229415	-0.0275299		0.0033528
GIJR138	2009-03-03	0.598449	0.2		2001-01-08	0.618209	0.057584	0.169927		0	1988-02-29	1.79324	1.23124	1.50276		98			253	155		-0.01976	-0.000201633	-0.00241959		-1.19479	-0.00472249	-0.0566699						-1.17503	-0.00758085	-0.0909701		0.0885506
GIJR139	2009-03-03	0.602763	0.2		2001-01-08	0.602668	0.092007	0.199464		0	1988-02-29	1.13495		1.24301		98			253	155		9.5e-05	9.69388e-07	1.16327e-05		-0.532184	-0.00210349	-0.0252419						-0.532279	-0.00343406	-0.0412087		0.0412203
GIJR140	2009-03-03	0.915861	0.2		2001-01-08	0.926846	0.03	0.227412		0	1988-02-29	0.915861		1.10369		98			253	155		-0.010985	-0.000112092	-0.0013451		0	0	0						0.010985	7.0871e-05	0.000850452		-0.00219555
GIJR23	2009-03-03	6.46125	0.7	0.017997	2001-09-26	6.5771	0.059966	0.699419	1997-10-01	6.67714	1988-02-29	7.33295	1.02787	3.36575		90	47		253	163		-0.115852	-0.00128724	-0.0154469		-0.8717	-0.00344545	-0.0413455		-0.100041	-0.00212853	-0.0255424		-0.755848	-0.0046371	-0.0556453		0.0401983
GIJR24	2009-03-03	0.477846	0.1		2001-01-08	0.477846	0.056388	0.140355		0	1988-02-29	0.488964	0.142916	0.709937		98			253	155		0	0	0		-0.011118	-4.39447e-05	-0.000527336						-0.011118	-7.1729e-05	-0.000860748		0.000860748
GIJR27	2009-03-03	28.6464	1.6	0.130028	2001-09-26	29.5986	0.144514	1.61671	1997-10-01	29.8739	1988-02-29	31.6735	0.679714	8.18829		90	47		253	163		-0.9522	-0.01058	-0.12696		-3.02707	-0.0119647	-0.143576		-0.275342	-0.00585834	-0.0703001		-2.07487	-0.0127292	-0.152751		0.0257909
GIJR34	2009-03-03	0.177312	0.1		2001-01-08	0.177312		0.096637		0	1988-02-29	0.216239		0.518144		98			253	155		0	0	0		-0.038927	-0.000153862	-0.00184634						-0.038927	-0.000251142	-0.0030137		0.0030137
GIJR37	2009-03-03	0.581729	0.2		2001-01-08	0.581729	0.03816	0.244517		0	1988-02-29	0.697473		1.17956		98			253	155		0	0	0		-0.115744	-0.000457486	-0.00548983						-0.115744	-0.000746735	-0.00896083		0.00896083
GIJR38	2009-03-03	1.22353	0.2	0.08934	2001-01-08	1.25464	0.067895	0.244256		0	1988-02-29	1.22353	0.46578	1.18297		98			253	155		-0.031114	-0.00031749	-0.00380988		0	0	0						0.031114	0.000200735	0.00240883		-0.0062187
GIJR39	2009-03-03	0.615429	0.1	0.049424	2001-01-08	0.643319	0.067092	0.139828		0	1988-02-29	0.698633	0.24418	0.76493		98			253	155		-0.02789	-0.000284592	-0.0034151		-0.083204	-0.00032887	-0.00394643						-0.055314	-0.000356865	-0.00428237		0.000867272
GIJR40	2009-03-03	3.61467	0.6	0.049673	2001-01-08	3.61099	0.044861	0.578942		0	1988-02-29	3.83043	0.235374	2.8303		98			253	155		0.003679	3.75408e-05	0.00045049		-0.215759	-0.000852802	-0.0102336						-0.219438	-0.00141573	-0.0169887		0.0174392
GIJR41	2009-03-03	0.177867	0.1	0.027394	2001-01-08	0.178319		0.071263		0	1988-02-29	0.228013	0.17761	0.402747		98			253	155		-0.000452	-4.61224e-06	-5.53469e-05		-0.050146	-0.000198206	-0.00237847						-0.049694	-0.000320606	-0.00384728		0.00379193
GIJR42	2009-03-03	0.800457	0.2	0.043379	2001-01-08	0.828814		0.190693		0	1988-02-29	1.09453	0.450809	1.13527		98			253	155		-0.028357	-0.000289357	-0.00347229		-0.294077	-0.00116236	-0.0139483						-0.26572	-0.00171432	-0.0205719		0.0170996
GIJR45	2009-03-03	2.36037	0.3	0.086224	2001-01-08	2.36039	0.080472	0.334069		0	1988-02-29	2.36039	0.445998	1.66644		98			253	155		-1.7e-05	-1.73469e-07	-2.08163e-06		-1.7e-05	-6.71937e-08	-8.06324e-07						0	0	0		-2.08163e-06
GIJR47	2009-03-03	0.491472	0.1	0.041221	2001-01-08	0.491472		0.121154		0	1988-02-29	0.659636	0.356119	0.678616		98			253	155		0	0	0		-0.168164	-0.00066468	-0.00797616						-0.168164	-0.00108493	-0.0130191		0.0130191
GIJR48	2009-03-03	2.46665	0.4	0.070819	2001-01-08	2.53485	0.12514	0.394435		0	1988-02-29	2.59981	0.308945	1.84812		98			253	155		-0.068203	-0.000695949	-0.00835139		-0.133165	-0.000526344	-0.00631613						-0.064962	-0.00041911	-0.00502932		-0.00332207
GIJR49	2009-03-03	3.18829	0.5	0.14077	2001-01-08	3.3331	0.104908	0.542202		0	1988-02-29	3.5324	0.716702	2.63878		98			253	155		-0.144815	-0.0014777	-0.0177324		-0.344115	-0.00136014	-0.0163217						-0.1993	-0.00128581	-0.0154297		-0.00230277
GIJR51	2009-03-03	1.57269	0.3	0.11215	2001-01-08	1.72589	0.09565	0.298773		0	1988-02-29	1.72003	0.659236	1.48228		98			253	155		-0.1532	-0.00156327	-0.0187592		-0.147342	-0.000582379	-0.00698855						0.005858	3.77935e-05	0.000453523		-0.0192127
GIJR52	2009-03-03	3.57723	0.5	0.103008	2001-01-08	3.70827	0.083219	0.472352		0	1988-02-29	4.09516	0.482513	2.40813		98			253	155		-0.131047	-0.00133721	-0.0160466		-0.517927	-0.00204714	-0.0245657						-0.38688	-0.002496	-0.029952		0.0139054
GIJR53	2009-03-03	1.91975	0.3	0.05244	2001-01-08	1.91975	0.052416	0.341749		0						98						0		0
GIJR54	2009-03-03	3.26434	0.3		2001-01-08	3.32112	0.04	0.33958		0	1988-02-29	3.26434		1.70521		98			253	155		-0.056775	-0.000579337	-0.00695204		0	0	0						0.056775	0.00036629	0.00439548		-0.0113475
GIJR55	2009-03-03	12.8335	0.9	0.140028	2001-01-08	12.8335	0.115837	0.855974		0	1988-02-29	13.0609	0.818802	4.2791		98			253	155		0	0	0		-0.227399	-0.00089881	-0.0107857						-0.227399	-0.00146709	-0.0176051		0.0176051
GIJR56	2009-03-03	10.9786	0.9	0.142409	2001-01-08	11.0255	0.116173	0.868775		0	1988-02-29	11.6353	0.842948	4.38768		98			253	155		-0.046898	-0.000478551	-0.00574261		-0.656671	-0.00259554	-0.0311465						-0.609773	-0.00393402	-0.0472082		0.0414656
GIJR58	2009-03-03	20.8875	1	0.078177	2001-09-26	21.0926	0.044523	0.987937	1997-10-01	21.0821	1988-02-29	22.4666	0.503608	5.18435		90	47		253	163		-0.205123	-0.00227914	-0.0273497		-1.57914	-0.00624165	-0.0748998		0.010505	0.000223511	0.00268213		-1.37401	-0.00842954	-0.101154		0.0738047
GIJR61	2009-03-03	75.6828	1.9	0.079352	2001-01-08	76.0939	0.06544	1.9035	1997-10-01	76.1572	1988-02-29	76.7875	0.524506	9.7621		98	39		253	155		-0.411134	-0.00419524	-0.0503429		-1.10478	-0.00436672	-0.0524006		-0.063281	-0.00162259	-0.0194711		-0.693645	-0.00447513	-0.0537015		0.00335861
GIJR62	2009-03-03	2.1815	0.6	0.01186	2001-01-08	2.20046	0.016766	0.578659		0	1988-02-29	2.40523	0.12976	2.90464		98			253	155		-0.018958	-0.000193449	-0.00232139		-0.223724	-0.000884285	-0.0106114						-0.204766	-0.00132107	-0.0158529		0.0135315
GIJR64	2009-03-03	80.5728	1.9		2001-01-08	80.7177	0.127101	1.87121		0	1988-02-29	81.215	0.768893	9.49086		98			253	155		-0.144932	-0.0014789	-0.0177468		-0.64216	-0.00253818	-0.0304582						-0.497228	-0.00320792	-0.0384951		0.0207483
GIJR66	2009-03-03	26.0009	1.4	0.187671	2001-01-08	26.1614	0.085014	1.38535		0	1988-02-29	26.3248	0.442555	6.98418		98			253	155		-0.160497	-0.00163772	-0.0196527		-0.323864	-0.00128009	-0.0153611						-0.163367	-0.00105398	-0.0126478		-0.00700493
GIJR67	2009-03-03	36.2563	1.5	0.071287	2001-01-08	36.4601	0.061858	1.53827		0	1988-02-29	37.9128	0.513815	8.20948		98			253	155		-0.203791	-0.0020795	-0.024954		-1.65655	-0.00654764	-0.0785716						-1.45276	-0.00937265	-0.112472		0.0875178
GIJR68	2009-03-03	3.14659	0.4	0.052598	2001-01-08	3.20268	0.104501	0.392269		0	1988-02-29	3.53451	0.564281	1.98779		98			253	155		-0.056092	-0.000572367	-0.00686841		-0.38792	-0.00153328	-0.0183994						-0.331828	-0.00214083	-0.0256899		0.0188215
GIJR70	2009-03-03	1.40406	0.3	0.070872	2001-01-08	1.43158	0.057665	0.298576		0	1988-02-29	1.46755	0.249312	1.45047		98			253	155		-0.027519	-0.000280806	-0.00336967		-0.063489	-0.000250945	-0.00301134						-0.03597	-0.000232065	-0.00278477		-0.000584899
GIJR71	2009-03-03	4.57378	0.4	0.045645	2001-01-08	4.87788	0.059887	0.457183		0	1988-02-29	4.77798	0.272083	2.25489		98			253	155		-0.304103	-0.00310309	-0.0372371		-0.204202	-0.000807123	-0.00968547						0.099901	0.000644523	0.00773427		-0.0449714
GIJR72	2009-03-03	70.6341	2.9	0.152286	2001-01-08	69.522	0.150144	2.92384	1997-10-01	69.1599	1988-02-29	73.3855	0.679554	14.5896		98	39		253	155		1.11212	0.0113482	0.136178		-2.75134	-0.0108749	-0.130498		0.362067	0.00928377	0.111405		-3.86346	-0.0249255	-0.299107		0.435285
GIJR75	2009-03-03	0.360211	0.1		2001-02-14	0.360211	0.066674	0.104358		0	1988-02-29	0.493776	0.259894	0.619539		97			253	156		0	0	0		-0.133565	-0.000527925	-0.0063351						-0.133565	-0.000856186	-0.0102742		0.0102742
GIJR76	2009-03-03	1.64398	0.3	0.081567	2001-01-08	1.64398	0.111968	0.257507		0	1988-02-29	1.80112	0.438801	1.50468		98			253	155		0		0		-0.15714	-0.000621107	-0.00745328						-0.15714	-0.00101381	-0.0121657		0.0121657
GIJR77	2009-03-03	4.02097	0.4	0.121194	2001-01-08	4.1244	0.077958	0.3912		0	1988-02-29	4.25787	0.607421	2.04746		98			253	155		-0.103436	-0.00105547	-0.0126656		-0.236905	-0.000936383	-0.0112366						-0.133469	-0.00086109	-0.0103331		-0.00233255
GIJR78	2009-03-03	4.80066	0.4	0.025962	2001-02-14	4.70395		0.41069		0	1988-02-29	5.26582	0.161552	2.18911		97			253	156		0.096712	0.000997031	0.0119644		-0.465158	-0.00183857	-0.0220628						-0.56187	-0.00360173	-0.0432208		0.0551851
GIJR79	2009-03-03	1.37855	0.3		2001-02-14	1.52309		0.324798		0	1988-02-29	1.76014	0.600067	1.69318		97			253	156		-0.144541	-0.00149011	-0.0178814		-0.381592	-0.00150827	-0.0180992						-0.237051	-0.00151956	-0.0182347		0.000353331
GIJR80	2009-03-03	0.137243	0.1		2001-02-14	0.137243		0.064955		0	1988-02-29	0.181713	0.224306	0.390951		97			253	156		0		0		-0.04447	-0.000175771	-0.00210925						-0.04447	-0.000285064	-0.00342077		0.00342077
GIJR81	2009-03-03	8.03972	0.7	0.021357	2001-01-08	8.12597	0.098626	0.689002		0	1988-02-29	8.59607		3.63076		98			253	155		-0.086255	-0.000880153	-0.0105618		-0.556356	-0.00219904	-0.0263884						-0.470101	-0.00303291	-0.0363949		0.0258331
GIJR83	2009-03-03	5.10351	0.5	0.055779	2001-01-08	5.19763	0.112987	0.492897		0	1988-02-29	5.39457	0.293589	2.47885		98			253	155		-0.094128	-0.00096049	-0.0115259		-0.291061	-0.00115044	-0.0138053						-0.196933	-0.00127054	-0.0152464		0.00372055
GIJR84	2009-03-03	30.6002	1.6	0.245826	2001-09-26	48.8382	0.3	2.42125	1997-10-01	48.3343	1988-02-29	48.6385	5.28652	11.5454		90	47		253	163		-18.238	-0.202644	-2.43173		-18.0383	-0.0712978	-0.855573		0.5039	0.0107213	0.128655		0.199654	0.00122487	0.0146985		-2.44643
GIJR86	2009-03-03	9.50235	0.7	0.081714	2001-01-08	9.62728	0.154946	0.670883		0	1988-02-29	11.1498	0.784879	3.78028		98			253	155		-0.124926	-0.00127476	-0.0152971		-1.64745	-0.00651167	-0.07814						-1.52253	-0.00982275	-0.117873		0.102576
GIJR87	2009-03-03	5.54957	0.6	0.084769	2001-01-08	5.76598	0.137838	0.593788		0	1988-02-29	6.2348	0.677142	3.00086		98			253	155		-0.216411	-0.00220828	-0.0264993		-0.68523	-0.00270842	-0.032501						-0.468819	-0.00302464	-0.0362957		0.00979636
GIJR89	2009-03-03	13.228	0.9	0.105165	2001-09-26	13.4784	0.107774	0.886268		0	1988-02-29	15.2597	0.948353	4.67424		90			253	163		-0.250385	-0.00278206	-0.0333847		-2.03166	-0.00803026	-0.0963632						-1.78127	-0.010928	-0.131137		0.0977519
GIJR90	2009-03-03	24.9415	0.9	0.24796	2001-09-26	39.2238	0.2	1.32837	1997-10-01	38.4023	1988-02-29	39.0075	2.97827	6.4855		90	47		253	163		-14.2823	-0.158692	-1.90431		-14.066	-0.0555967	-0.667161		0.821541	0.0174796	0.209755		0.216323	0.00132713	0.0159256		-1.92023
GIJR91	2009-03-03	3.01512	0.4	0.085166	2001-09-26	3.01512	0.086498	0.378013		0	1988-02-29	3.38864	0.656107	1.95253		90			253	163		0	0	0		-0.373514	-0.00147634	-0.0177161						-0.373514	-0.0022915	-0.027498		0.027498
GIJR92	2009-03-03	14.7794	0.8	0.215585	2001-09-26	34.8154	1.36854	2.02457	1997-10-01	41.9144	1988-02-29	45.6813	10.2923	13.4347		90	47		253	163		-20.036	-0.222622	-2.67147		-30.9019	-0.122142	-1.4657		-7.09898	-0.151042	-1.81251		-10.8659	-0.0666619	-0.799943		-1.87152
GIJR93	2009-03-03	42.7852	1.5	0.181716	2001-01-08	63.059	1.39831	2.73188	1997-10-01	75.9593	1988-02-29	92.3988	13.9337	20.6787		98	39		253	155		-20.2738	-0.206875	-2.4825		-49.6136	-0.196101	-2.35321		-12.9003	-0.330778	-3.96934		-29.3398	-0.189289	-2.27147		-0.21103
GIJR94	2009-03-03	24.8969	1.3	0.053839	2001-01-08	26.2134	0.22229	1.45753	1997-10-01	26.2244	1988-02-29	26.2298	1.09818	7.23069		98	39		253	155		-1.31651	-0.0134338	-0.161205		-1.3329	-0.00526836	-0.0632204		-0.010995	-0.000281923	-0.00338308		-0.016386	-0.000105716	-0.00126859		-0.159937
GIJR95	2009-03-03	72.495	2.4	0.241664	2001-01-08	85.9334	1.07962	3.2998	1997-10-01	92.0625	1988-02-29	102.764	13.2773	24.2366		98	39		253	155		-13.4385	-0.137127	-1.64552		-30.2692	-0.119641	-1.43569		-6.12911	-0.157157	-1.88588		-16.8308	-0.108586	-1.30303		-0.342497
GIJR96	2009-03-03	37.5325	1.5	0.773005	2001-01-08	46.5793	0.556015	1.87421	1997-10-01	80.8557	1988-02-29	104.23	10.9041	15.5451		98	39		253	155		-9.04676	-0.0923139	-1.10777		-66.6977	-0.263627	-3.16353		-34.2764	-0.878881	-10.5466		-57.6509	-0.371941	-4.4633		3.35553
GIJR97	2009-03-03	123.371	3.2	0.189101	2001-01-08	125.93	0.183635	3.23298	1997-10-01	142.454	1988-02-29	186.711	7.87477	23.1026		98	39		253	155		-2.55912	-0.0261135	-0.313362		-63.34	-0.250356	-3.00427		-16.5235	-0.423679	-5.08414		-60.7809	-0.392135	-4.70561		4.39225
GIJR99	2009-03-03	24.4712	1.4	0.208964	2001-01-08	24.8834	0.09331	1.41292	1997-10-01	29.7543	1988-02-29	39.0542	5.55999	12.2878		98	39		253	155		-0.412219	-0.00420632	-0.0504758		-14.583	-0.0576404	-0.691685		-4.87089	-0.124895	-1.49874		-14.1708	-0.0914245	-1.09709		1.04662
GIV01	2008-03-23	2.54952	0.4	0.017053	2001-01-08	2.54952	0.024395	0.399598		0	1988-02-29	2.76271	1.09791	1.96375		86			241	155		0	0	0		-0.21319	-0.000884606	-0.0106153						-0.21319	-0.00137542	-0.016505		0.016505
GIV02	2009-03-03	3.48015	0.4	0.015995	2001-02-14	3.49863	0.023743	0.393227		0	1988-02-29	3.61749	0.749923	1.95526		97			253	156		-0.018479	-0.000190505	-0.00228606		-0.137334	-0.000542822	-0.00651387						-0.118855	-0.000761891	-0.00914269		0.00685663
GIV03	2009-03-03	3.31391	0.4	0.00764	2001-02-14	3.3668	0.039602	0.402545		0	1988-02-29	3.45303	0.361463	2.08204		97			253	156		-0.052883	-0.000545186	-0.00654223		-0.139118	-0.000549874	-0.00659848						-0.086235	-0.000552788	-0.00663346		9.12347e-05
GIV04	2009-03-03	1.96854	0.3	0.020693	2001-02-14	1.97055	0.020693	0.300348		0	1988-02-29	1.98425	0.145184	1.5015		97			253	156		-0.002002	-2.06392e-05	-0.00024767		-0.015708	-6.2087e-05	-0.000745043						-0.013706	-8.7859e-05	-0.00105431		0.000806638
GIV05	2009-03-03	11.9218	1.1		2001-02-14	11.9756	0.013578	1.13103		0	1988-02-29	11.9544	0.153347	5.40756		97			253	156		-0.053774	-0.000554371	-0.00665245		-0.032559	-0.000128692	-0.0015443						0.021215	0.000135994	0.00163192		-0.00828438
GIV09	2009-03-03	18.2968	1	0.173766		0				0	1988-02-29	18.8302	1.52947	4.84456					253							-0.533447	-0.00210849	-0.0253018
GIV10	2009-03-03	13.1754	0.8	0.029328		0				0	1988-02-29	13.7237	0.89941	4.26891					253							-0.548232	-0.00216692	-0.0260031
GIV12	2009-03-03	9.77815	0.7	0.036455		0				0	1988-02-29	10.2363	0.901327	3.58587					253							-0.458187	-0.00181102	-0.0217322
GIV13	2009-03-03	7.81593	0.7	0.074721		0				0	1988-02-29	8.04096	0.808864	3.47776					253							-0.22503	-0.000889447	-0.0106734
GIV14	2009-03-03	6.21548	0.5	0.07305		0				0	1988-02-29	6.70406	0.574225	2.54939					253							-0.488578	-0.00193114	-0.0231737
GIV15	2009-03-03	9.19092	0.7	0.081571	2001-09-28	9.20213	0.102343	0.692593		0	1988-02-29	10.1578	0.974809	3.46651		90			253	163		-0.011214	-0.0001246	-0.0014952		-0.966857	-0.00382157	-0.0458588						-0.955643	-0.00586284	-0.0703541		0.0688589
GIV17	2009-03-03	4.87715	0.5	0.050309	2001-09-28	4.95821	0.051288	0.507537		0	1988-02-29	5.24919	0.958033	2.6386		90			253	163		-0.081064	-0.000900711	-0.0108085		-0.372044	-0.00147053	-0.0176464						-0.29098	-0.00178515	-0.0214218		0.0106133
GIV18	2009-03-03	3.2681	0.4	0.043518	2001-09-28	3.5282	0.060952	0.450981		0	1988-02-29	3.68222	0.677133	2.27213		90			253	163		-0.260101	-0.00289001	-0.0346801		-0.414116	-0.00163682	-0.0196419						-0.154015	-0.000944877	-0.0113385		-0.0233416
GIV19	2009-03-03	6.01843	0.7	0.054305	2001-09-28	6.14454	0.057905	0.685107		0	1988-02-29	6.48273	1.35363	3.48863		90			253	163		-0.126103	-0.00140114	-0.0168137		-0.464296	-0.00183516	-0.0220219						-0.338193	-0.0020748	-0.0248976		0.00808391
GIV20	2009-03-03	5.25971	0.7	0.066596	2001-09-28	5.32656	0.076279	0.670372		0	1988-02-29	5.95039	1.02809	3.3751		90			253	163		-0.066847	-0.000742744	-0.00891293		-0.690677	-0.00272995	-0.0327594						-0.62383	-0.00382718	-0.0459261		0.0370132
GIV21	2009-03-03	1.81203	0.4		2001-09-28	1.93422	0.109575	0.360237		0	1988-02-29	1.93422	0.355525	1.76445		90			253	163		-0.122187	-0.00135763	-0.0162916		-0.122187	-0.000482953	-0.00579543						0	0	0		-0.0162916
GIV22	2009-03-03	5.97633	0.7	0.2426	2001-09-28	5.97633	0.251266	0.664591		0	1988-02-29	6.10815	0.74079	3.22513		90			253	163		0		0		-0.131822	-0.000521036	-0.00625243						-0.131822	-0.000808724	-0.00970469		0.00970469
GIV23	2009-03-03	4.66036	0.5	0.045446		0				0	1988-02-29	4.99348	0.571304	2.4827					253							-0.333121	-0.00131668	-0.0158002
GIV24	2009-03-03	6.30982	0.6	0.061855	2001-01-08	6.56144	0.069038	0.612937		0	1988-02-29	7.09439	1.35352	3.00647		98			253	155		-0.251623	-0.00256758	-0.030811		-0.784566	-0.00310105	-0.0372126						-0.532943	-0.00343834	-0.0412601		0.0104491
GIV25	2009-03-03	6.62214	0.5	0.061284	2001-01-08	6.8872	0.080286	0.562365		0	1988-02-29	7.35424	0.99627	2.83144		98			253	155		-0.265054	-0.00270463	-0.0324556		-0.732094	-0.00289365	-0.0347238						-0.46704	-0.00301316	-0.0361579		0.00370234
GIV26	2009-03-03	8.80852	0.6	0.064898	2001-01-08	8.97774	0.077459	0.607531		0	1988-02-29	9.21742	0.655398	3.06531		98			253	155		-0.169219	-0.00172672	-0.0207207		-0.408891	-0.00161617	-0.019394						-0.239672	-0.00154627	-0.0185553		-0.00216544
GIV28	2008-03-23	11.2691	1.1	0.050595	2001-01-08	11.5449	0.047182	1.07506		0	1988-02-29	11.5429	0.62195	5.49184		86			241	155		-0.275704	-0.00320586	-0.0384703		-0.273749	-0.00113589	-0.0136307						0.001955	1.26129e-05	0.000151355		-0.0386217
GIV29	2008-03-23	9.55326	0.6	0.039884	2001-01-08	9.73028	0.07441	0.630185		0	1988-02-29	10.6431	1.82229	3.32568		86			241	155		-0.177018	-0.00205835	-0.0247002		-1.08986	-0.00452225	-0.054267						-0.912845	-0.00588932	-0.0706719		0.0459717
GIV30	2009-03-03	5.70304	0.5			0				0	1988-02-29	6.1152	0.756795	2.85017					253							-0.412156	-0.00162908	-0.0195489
